# Supplementary material for: Effects of Stepwise Lung Recruitment Maneuvers in Patients with Early Acute Respiratory Distress Syndrome: A Prospective, Randomized, Controlled Trial
Source: MDPI journal article supplement (doi:10.3390/jcm8020231), 2019-02-10
Supplement: s1 [file s1]

**Table S1 Summary of the ventilator procedure**

| Variables                                                                             | LRM group                                                                          | Control group                                                                      |
|---------------------------------------------------------------------------------------|------------------------------------------------------------------------------------|------------------------------------------------------------------------------------|
| Ventilator mode                                                                       | Pressure control                                                                   | Volume assist-control                                                              |
| Initial tidal volume (mL/kg of predicted body weight) <sup>a</sup>                    | 6-8                                                                                | 6-8                                                                                |
| Plateau pressure (cmH <sub>2</sub> O)                                                 | ≤30                                                                                | ≤30                                                                                |
| Ventilator rate setting needed to achieve a pH goal of 7.3-7.45 (breaths/min)         | 10-35                                                                              | 10-35                                                                              |
| Ratio of the duration of inspiration to the duration of expiration                    | 1:1 to 1:3                                                                         | 1:1 to 1:3                                                                         |
| Oxygenation goal                                                                      | PaO <sub>2</sub> , 55-80 mmHg, or SpO <sub>2</sub> , 88-95%                        | PaO <sub>2</sub> , 55-80 mmHg, or SpO <sub>2</sub> , 88-95%                        |
|                                                                                       | 0.3 and 5                                                                          | 0.3 and 5                                                                          |
|                                                                                       | 0.4 and 5-8                                                                        | 0.4 and 5-8                                                                        |
|                                                                                       | 0.5 and 8-10                                                                       | 0.5 and 8-10                                                                       |
| Allowable combinations of FiO <sub>2</sub> and PEEP (cmH <sub>2</sub> O) <sup>b</sup> | 0.6 and 10                                                                         | 0.6 and 10                                                                         |
|                                                                                       | 0.7 and 10-14                                                                      | 0.7 and 10-14                                                                      |
|                                                                                       | 0.8 and 14                                                                         | 0.8 and 14                                                                         |
|                                                                                       | 0.9 and 14-18                                                                      | 0.9 and 14-18                                                                      |
|                                                                                       | 1.0 and 20-24                                                                      | 1.0 and 20-24                                                                      |
| Weaning                                                                               | By pressure support; required by protocol when FiO <sub>2</sub> ≤ 0.4 and PEEP ≤ 8 | By pressure support; required by protocol when FiO <sub>2</sub> ≤ 0.4 and PEEP ≤ 8 |

*PaO<sub>2</sub>* partial pressure of arterial oxygen, *SpO<sub>2</sub>* oxyhaemoglobin saturation measured by pulse oximetry, *FiO<sub>2</sub>* fraction of inspired oxygen, *PEEP* positive end-expiratory pressure

<sup>a</sup> Subsequent adjustments in tidal volume were made to maintain a plateau pressure of <50 cmH<sub>2</sub>O in the group receiving traditional tidal volumes and <30 cmH<sub>2</sub>O in the group receiving lower tidal volumes

<sup>b</sup> Further increases in PEEP, up to 34 cmH<sub>2</sub>O, were allowed but were not required
